# Supplementary material
Source: publisher figshare collection journal article supplement (https://acs.figshare.com/ndownloader/files/3873850)
Supplement: Supplementary file 1 [file 3873850]

data_compound7
 
_audit_creation_method            SHELXL-97 
_chemical_name_systematic 
; 
 ? 
; 
_chemical_name_common             ? 
_chemical_melting_point           ? 
_chemical_formula_moiety          ? 
_chemical_formula_sum 
 'C26 H21 N3 O2' 
_chemical_formula_weight          407.46
 
loop_ 
 _atom_type_symbol 
 _atom_type_description 
 _atom_type_scat_dispersion_real 
 _atom_type_scat_dispersion_imag 
 _atom_type_scat_source 
 'C'  'C'   0.0033   0.0016 
 'International Tables Vol C Tables 4.2.6.8 and 6.1.1.4' 
 'H'  'H'   0.0000   0.0000 
 'International Tables Vol C Tables 4.2.6.8 and 6.1.1.4' 
 'N'  'N'   0.0061   0.0033 
 'International Tables Vol C Tables 4.2.6.8 and 6.1.1.4' 
 'O'  'O'   0.0106   0.0060 
 'International Tables Vol C Tables 4.2.6.8 and 6.1.1.4' 
 
_symmetry_cell_setting            'Orthorhombic' 
_symmetry_space_group_name_H-M    'P2(1)2(1)2(1) ' 
 
loop_ 
 _symmetry_equiv_pos_as_xyz 
 'x, y, z' 
 '-x+1/2, -y, z+1/2' 
 'x+1/2, -y+1/2, -z' 
 '-x, y+1/2, -z+1/2' 
 
_cell_length_a                    9.135(5) 
_cell_length_b                    11.634(5) 
_cell_length_c                    20.550(5) 
_cell_angle_alpha                 90.000(5) 
_cell_angle_beta                  90.000(5) 
_cell_angle_gamma                 90.000(5) 
_cell_volume                      2184.0(16) 
_cell_formula_units_Z             4 
_cell_measurement_temperature     100 
_cell_measurement_reflns_used     3122 
_cell_measurement_theta_min       2.44 
_cell_measurement_theta_max       26.50 
 
_exptl_crystal_description        block 
_exptl_crystal_colour             colourless 
_exptl_crystal_size_max           0.15 
_exptl_crystal_size_mid           0.11 
_exptl_crystal_size_min           0.08 
_exptl_crystal_density_meas       ? 
_exptl_crystal_density_diffrn     1.239 
_exptl_crystal_density_method     'not measured' 
_exptl_crystal_F_000              856.0 
_exptl_absorpt_coefficient_mu     0.080 
_exptl_absorpt_correction_type    'none' 
_exptl_absorpt_correction_T_min   ? 
_exptl_absorpt_correction_T_max   ? 
_exptl_absorpt_process_details    ? 
 
_exptl_special_details 
; 
 ? 
; 
 
_diffrn_ambient_temperature       100 
_diffrn_radiation_wavelength      0.71069 
_diffrn_radiation_type            MoK\a 
_diffrn_radiation_source          'fine-focus sealed tube' 
_diffrn_radiation_monochromator   graphite 
_diffrn_measurement_device_type   'CCD area detector' 
_diffrn_measurement_method        'phi and omega scans' 
_diffrn_detector_area_resol_mean  ? 
_diffrn_standards_number          ? 
_diffrn_standards_interval_count  ? 
_diffrn_standards_interval_time   ? 
_diffrn_standards_decay_%         ? 
_diffrn_reflns_number             11332 
_diffrn_reflns_av_R_equivalents   0.1756 
_diffrn_reflns_av_sigmaI/netI     0.1324 
_diffrn_reflns_limit_h_min        -10 
_diffrn_reflns_limit_h_max        11 
_diffrn_reflns_limit_k_min        -14 
_diffrn_reflns_limit_k_max        12 
_diffrn_reflns_limit_l_min        -22 
_diffrn_reflns_limit_l_max        24 
_diffrn_reflns_theta_min          1.98 
_diffrn_reflns_theta_max          25.49 
_reflns_number_total              4032 
_reflns_number_gt                 3052 
_reflns_threshold_expression      >2sigma(I) 
 
_computing_data_collection        'Bruker SMART' 
_computing_cell_refinement        'Bruker SMART' 
_computing_data_reduction         'Bruker SAINT' 
_computing_structure_solution     'SHELXS-97 (Sheldrick, 1990)' 
_computing_structure_refinement   'SHELXL-97 (Sheldrick, 1997)' 
_computing_molecular_graphics     'Bruker SHELXTL' 
_computing_publication_material   'Bruker SHELXTL' 
 
_refine_special_details 
; 
 Refinement of F^2^ against ALL reflections.  The weighted R-factor wR and 
 goodness of fit S are based on F^2^, conventional R-factors R are based 
 on F, with F set to zero for negative F^2^. The threshold expression of 
 F^2^ > 2sigma(F^2^) is used only for calculating R-factors(gt) etc. and is 
 not relevant to the choice of reflections for refinement.  R-factors based 
 on F^2^ are statistically about twice as large as those based on F, and R- 
 factors based on ALL data will be even larger. 
; 
 
_refine_ls_structure_factor_coef  Fsqd  
_refine_ls_matrix_type            full 
_refine_ls_weighting_scheme       calc  
_refine_ls_weighting_details 
 'calc w=1/[\s^2^(Fo^2^)+(0.0436P)^2^+0.2377P] where P=(Fo^2^+2Fc^2^)/3' 
_atom_sites_solution_primary      direct 
_atom_sites_solution_secondary    difmap 
_atom_sites_solution_hydrogens    geom 
_refine_ls_hydrogen_treatment     mixed 
_refine_ls_extinction_method      none 
_refine_ls_extinction_coef        ? 
_refine_ls_abs_structure_details 
 'Flack H D (1983), Acta Cryst. A39, 876-881' 
_refine_ls_abs_structure_Flack    -0.9(16) 
_refine_ls_number_reflns          4032 
_refine_ls_number_parameters      280 
_refine_ls_number_restraints      0 
_refine_ls_R_factor_all           0.0656 
_refine_ls_R_factor_gt            0.0470 
_refine_ls_wR_factor_ref          0.1097 
_refine_ls_wR_factor_gt           0.0999 
_refine_ls_goodness_of_fit_ref    1.052 
_refine_ls_restrained_S_all       1.052 
_refine_ls_shift/su_max           0.000 
_refine_ls_shift/su_mean          0.000 
 
loop_ 
 _atom_site_label 
 _atom_site_type_symbol 
 _atom_site_fract_x 
 _atom_site_fract_y 
 _atom_site_fract_z 
 _atom_site_U_iso_or_equiv 
 _atom_site_adp_type 
 _atom_site_occupancy 
 _atom_site_symmetry_multiplicity 
 _atom_site_calc_flag 
 _atom_site_refinement_flags 
 _atom_site_disorder_assembly 
 _atom_site_disorder_group 
O1 O 0.02607(17) 0.05780(14) 0.65317(8) 0.0516(4) Uani 1 1 d . . . 
N1 N 0.7308(2) 0.14322(18) 0.60865(10) 0.0533(5) Uani 1 1 d . . . 
H1A H 0.8041 0.1201 0.6314 0.064 Uiso 1 1 calc R . . 
H1B H 0.7450 0.1856 0.5750 0.064 Uiso 1 1 calc R . . 
N2 N 0.4041(3) 0.2423(3) 0.49450(15) 0.1055(11) Uani 1 1 d . . . 
C1 C 0.0957(3) 0.15039(18) 0.68213(11) 0.0434(5) Uani 1 1 d . . . 
C2 C 0.0104(3) 0.2252(2) 0.71786(13) 0.0602(7) Uani 1 1 d . . . 
H2 H -0.0891 0.2113 0.7231 0.072 Uiso 1 1 calc R . . 
C3 C 0.0740(3) 0.3207(3) 0.74567(14) 0.0719(9) Uani 1 1 d . . . 
H3 H 0.0172 0.3714 0.7699 0.086 Uiso 1 1 calc R . . 
C4 C 0.2204(3) 0.3410(3) 0.73778(15) 0.0727(9) Uani 1 1 d . . . 
H4 H 0.2632 0.4057 0.7564 0.087 Uiso 1 1 calc R . . 
C5 C 0.3042(3) 0.2656(2) 0.70231(13) 0.0563(7) Uani 1 1 d . . . 
H5 H 0.4035 0.2806 0.6970 0.068 Uiso 1 1 calc R . . 
C6 C 0.2451(2) 0.16794(18) 0.67416(10) 0.0396(5) Uani 1 1 d . . . 
C7 C 0.0905(3) 0.0300(2) 0.59131(12) 0.0509(6) Uani 1 1 d . . . 
H7A H 0.0847 0.0965 0.5629 0.061 Uiso 1 1 calc R . . 
H7B H 0.0354 -0.0319 0.5713 0.061 Uiso 1 1 calc R . . 
C8 C 0.2494(3) -0.00612(18) 0.59836(11) 0.0396(5) Uani 1 1 d . . . 
H8 H 0.2922 -0.0095 0.5547 0.048 Uiso 1 1 calc R . . 
C9 C 0.3406(2) 0.08066(16) 0.63914(10) 0.0346(5) Uani 1 1 d . . . 
C10 C 0.4383(2) 0.00371(18) 0.68623(10) 0.0373(5) Uani 1 1 d . . . 
C11 C 0.4270(3) -0.11610(18) 0.65699(11) 0.0433(5) Uani 1 1 d . . . 
H11A H 0.4436 -0.1744 0.6899 0.052 Uiso 1 1 calc R . . 
H11B H 0.4981 -0.1261 0.6224 0.052 Uiso 1 1 calc R . . 
O2 O 0.58793(16) 0.04659(13) 0.67941(7) 0.0425(4) Uani 1 1 d . . . 
C13 C 0.5947(3) 0.11328(18) 0.62560(10) 0.0388(5) Uani 1 1 d . . . 
C14 C 0.4619(2) 0.13658(19) 0.59970(11) 0.0399(5) Uani 1 1 d . . . 
C15 C 0.4339(3) 0.1970(2) 0.54225(13) 0.0590(7) Uani 1 1 d . . . 
C16 C 0.2706(3) -0.12395(18) 0.63026(10) 0.0422(5) Uani 1 1 d . . . 
H16 H 0.2033 -0.1293 0.6673 0.051 Uiso 1 1 calc R . . 
C17 C 0.2433(3) -0.2260(2) 0.58636(12) 0.0500(6) Uani 1 1 d . . . 
C18 C 0.1621(4) -0.3175(2) 0.60893(17) 0.0782(9) Uani 1 1 d . . . 
H18 H 0.1204 -0.3138 0.6502 0.094 Uiso 1 1 calc R . . 
C19 C 0.1413(5) -0.4149(3) 0.5714(3) 0.1138(15) Uani 1 1 d . . . 
H19 H 0.0889 -0.4769 0.5880 0.137 Uiso 1 1 calc R . . 
C20 C 0.1977(5) -0.4195(4) 0.5106(3) 0.1118(16) Uani 1 1 d . . . 
H20 H 0.1820 -0.4844 0.4851 0.134 Uiso 1 1 calc R . . 
C21 C 0.2767(5) -0.3306(3) 0.48634(17) 0.0929(12) Uani 1 1 d . . . 
H21 H 0.3140 -0.3342 0.4443 0.111 Uiso 1 1 calc R . . 
C22 C 0.3017(4) -0.2341(3) 0.52472(13) 0.0714(9) Uani 1 1 d . . . 
H22 H 0.3586 -0.1743 0.5086 0.086 Uiso 1 1 calc R . . 
C23 C 0.4021(3) 0.00744(18) 0.75839(10) 0.0412(5) Uani 1 1 d . . . 
C24 C 0.4871(3) 0.0638(2) 0.80360(12) 0.0640(8) Uani 1 1 d . . . 
H24 H 0.5703 0.1037 0.7905 0.077 Uiso 1 1 calc R . . 
C25 C 0.4485(4) 0.0608(3) 0.86825(13) 0.0864(10) Uani 1 1 d . . . 
H25 H 0.5053 0.0980 0.8994 0.104 Uiso 1 1 calc R . . 
C26 C 0.3245(4) 0.0021(3) 0.88599(13) 0.0823(10) Uani 1 1 d . . . 
H26 H 0.2944 -0.0004 0.9292 0.099 Uiso 1 1 calc R . . 
C27 C 0.2470(4) -0.0522(3) 0.83874(13) 0.0751(9) Uani 1 1 d . . . 
H27 H 0.1641 -0.0933 0.8510 0.090 Uiso 1 1 calc R . . 
N3 N 0.2829(3) -0.0501(2) 0.77561(9) 0.0604(6) Uani 1 1 d . . . 
 
loop_ 
 _atom_site_aniso_label 
 _atom_site_aniso_U_11 
 _atom_site_aniso_U_22 
 _atom_site_aniso_U_33 
 _atom_site_aniso_U_23 
 _atom_site_aniso_U_13 
 _atom_site_aniso_U_12 
O1 0.0298(9) 0.0537(9) 0.0713(11) -0.0088(9) 0.0003(8) -0.0025(7) 
N1 0.0335(12) 0.0712(14) 0.0552(12) 0.0133(10) 0.0008(10) -0.0074(10) 
N2 0.075(2) 0.147(2) 0.0940(19) 0.0771(19) -0.0167(17) -0.0115(19) 
C1 0.0334(14) 0.0486(13) 0.0481(13) -0.0007(10) -0.0004(11) 0.0009(11) 
C2 0.0332(15) 0.0743(18) 0.0732(17) -0.0180(15) 0.0044(14) 0.0089(13) 
C3 0.056(2) 0.080(2) 0.079(2) -0.0320(16) 0.0012(16) 0.0137(16) 
C4 0.0500(19) 0.0727(19) 0.095(2) -0.0399(17) -0.0076(17) 0.0017(15) 
C5 0.0367(15) 0.0557(15) 0.0763(18) -0.0175(13) -0.0042(13) 0.0003(12) 
C6 0.0303(13) 0.0433(12) 0.0453(12) -0.0040(10) -0.0036(11) 0.0036(10) 
C7 0.0409(15) 0.0516(15) 0.0603(15) -0.0091(11) -0.0151(13) 0.0013(11) 
C8 0.0364(13) 0.0444(12) 0.0381(11) -0.0046(9) -0.0033(10) 0.0020(10) 
C9 0.0279(12) 0.0390(12) 0.0368(12) 0.0010(9) -0.0023(9) -0.0018(9) 
C10 0.0272(12) 0.0424(11) 0.0422(12) 0.0041(9) -0.0010(10) -0.0032(9) 
C11 0.0421(15) 0.0424(12) 0.0453(12) 0.0011(10) -0.0029(11) 0.0068(10) 
O2 0.0270(8) 0.0537(9) 0.0469(8) 0.0113(7) -0.0051(7) -0.0023(7) 
C13 0.0315(13) 0.0435(12) 0.0414(12) -0.0011(10) 0.0023(10) -0.0009(10) 
C14 0.0329(13) 0.0457(13) 0.0410(12) 0.0057(10) -0.0007(10) 0.0014(10) 
C15 0.0420(17) 0.0698(17) 0.0650(16) 0.0247(14) -0.0006(13) -0.0070(13) 
C16 0.0377(14) 0.0435(12) 0.0453(13) -0.0049(10) -0.0015(11) -0.0009(10) 
C17 0.0471(16) 0.0474(14) 0.0555(15) -0.0077(11) -0.0088(13) 0.0053(12) 
C18 0.078(2) 0.0616(18) 0.095(2) -0.0230(17) -0.0009(19) -0.0147(16) 
C19 0.117(4) 0.072(2) 0.152(4) -0.038(2) -0.007(3) -0.025(2) 
C20 0.121(4) 0.087(3) 0.127(4) -0.059(3) -0.039(3) 0.010(3) 
C21 0.107(3) 0.098(3) 0.073(2) -0.036(2) -0.017(2) 0.038(2) 
C22 0.084(2) 0.0704(18) 0.0592(18) -0.0205(14) -0.0065(16) 0.0202(16) 
C23 0.0411(14) 0.0420(11) 0.0406(12) 0.0039(9) -0.0024(11) -0.0028(11) 
C24 0.069(2) 0.0768(18) 0.0463(15) -0.0045(13) -0.0005(14) -0.0276(15) 
C25 0.103(3) 0.110(3) 0.0465(17) -0.0174(16) -0.0030(17) -0.033(2) 
C26 0.105(3) 0.103(2) 0.0394(15) -0.0039(15) 0.0113(16) -0.025(2) 
C27 0.081(2) 0.095(2) 0.0493(15) 0.0033(14) 0.0125(16) -0.0315(19) 
N3 0.0572(15) 0.0820(15) 0.0421(11) -0.0032(10) 0.0064(11) -0.0255(12) 
 
_geom_special_details 
; 
 All esds (except the esd in the dihedral angle between two l.s. planes) 
 are estimated using the full covariance matrix.  The cell esds are taken 
 into account individually in the estimation of esds in distances, angles 
 and torsion angles; correlations between esds in cell parameters are only 
 used when they are defined by crystal symmetry.  An approximate (isotropic) 
 treatment of cell esds is used for estimating esds involving l.s. planes. 
; 
 
loop_ 
 _geom_bond_atom_site_label_1 
 _geom_bond_atom_site_label_2 
 _geom_bond_distance 
 _geom_bond_site_symmetry_2 
 _geom_bond_publ_flag 
O1 C1 1.385(3) . ? 
O1 C7 1.437(3) . ? 
N1 C13 1.337(3) . ? 
N2 C15 1.147(3) . ? 
C1 C2 1.380(3) . ? 
C1 C6 1.390(3) . ? 
C2 C3 1.377(4) . ? 
C3 C4 1.368(4) . ? 
C4 C5 1.373(4) . ? 
C5 C6 1.384(3) . ? 
C6 C9 1.520(3) . ? 
C7 C8 1.518(4) . ? 
C8 C16 1.532(3) . ? 
C8 C9 1.554(3) . ? 
C9 C14 1.519(3) . ? 
C9 C10 1.592(3) . ? 
C10 O2 1.462(3) . ? 
C10 C23 1.520(3) . ? 
C10 C11 1.521(3) . ? 
C11 C16 1.534(3) . ? 
O2 C13 1.352(3) . ? 
C13 C14 1.352(3) . ? 
C14 C15 1.397(3) . ? 
C16 C17 1.511(3) . ? 
C17 C22 1.378(4) . ? 
C17 C18 1.379(4) . ? 
C18 C19 1.383(5) . ? 
C19 C20 1.354(6) . ? 
C20 C21 1.356(6) . ? 
C21 C22 1.391(4) . ? 
C23 N3 1.326(3) . ? 
C23 C24 1.377(3) . ? 
C24 C25 1.375(4) . ? 
C25 C26 1.372(5) . ? 
C26 C27 1.358(4) . ? 
C27 N3 1.338(3) . ? 
 
loop_ 
 _geom_angle_atom_site_label_1 
 _geom_angle_atom_site_label_2 
 _geom_angle_atom_site_label_3 
 _geom_angle 
 _geom_angle_site_symmetry_1 
 _geom_angle_site_symmetry_3 
 _geom_angle_publ_flag 
C1 O1 C7 111.52(18) . . ? 
C2 C1 O1 117.4(2) . . ? 
C2 C1 C6 121.6(2) . . ? 
O1 C1 C6 121.0(2) . . ? 
C3 C2 C1 119.4(3) . . ? 
C4 C3 C2 120.2(3) . . ? 
C3 C4 C5 119.8(3) . . ? 
C4 C5 C6 122.0(3) . . ? 
C5 C6 C1 117.0(2) . . ? 
C5 C6 C9 121.5(2) . . ? 
C1 C6 C9 121.43(19) . . ? 
O1 C7 C8 111.66(18) . . ? 
C7 C8 C16 114.2(2) . . ? 
C7 C8 C9 112.60(19) . . ? 
C16 C8 C9 106.43(17) . . ? 
C14 C9 C6 112.65(17) . . ? 
C14 C9 C8 112.45(18) . . ? 
C6 C9 C8 112.41(18) . . ? 
C14 C9 C10 99.00(18) . . ? 
C6 C9 C10 114.17(17) . . ? 
C8 C9 C10 105.25(16) . . ? 
O2 C10 C23 106.69(17) . . ? 
O2 C10 C11 109.76(18) . . ? 
C23 C10 C11 113.38(18) . . ? 
O2 C10 C9 105.88(16) . . ? 
C23 C10 C9 117.09(18) . . ? 
C11 C10 C9 103.72(16) . . ? 
C10 C11 C16 105.02(17) . . ? 
C13 O2 C10 108.50(16) . . ? 
N1 C13 O2 113.9(2) . . ? 
N1 C13 C14 132.8(2) . . ? 
O2 C13 C14 113.30(19) . . ? 
C13 C14 C15 126.7(2) . . ? 
C13 C14 C9 111.01(19) . . ? 
C15 C14 C9 122.2(2) . . ? 
N2 C15 C14 175.9(3) . . ? 
C17 C16 C8 115.25(18) . . ? 
C17 C16 C11 114.46(19) . . ? 
C8 C16 C11 102.57(18) . . ? 
C22 C17 C18 117.7(3) . . ? 
C22 C17 C16 122.6(2) . . ? 
C18 C17 C16 119.7(2) . . ? 
C17 C18 C19 121.3(4) . . ? 
C20 C19 C18 119.7(4) . . ? 
C19 C20 C21 120.8(3) . . ? 
C20 C21 C22 119.7(4) . . ? 
C17 C22 C21 120.9(3) . . ? 
N3 C23 C24 121.5(2) . . ? 
N3 C23 C10 115.11(19) . . ? 
C24 C23 C10 123.3(2) . . ? 
C25 C24 C23 119.7(3) . . ? 
C26 C25 C24 118.8(3) . . ? 
C27 C26 C25 118.2(3) . . ? 
N3 C27 C26 123.8(3) . . ? 
C23 N3 C27 118.0(2) . . ? 
 
_diffrn_measured_fraction_theta_max    0.997 
_diffrn_reflns_theta_full              25.49 
_diffrn_measured_fraction_theta_full   0.997 
_refine_diff_density_max    0.149 
_refine_diff_density_min   -0.169 
_refine_diff_density_rms    0.036 
